# Supplementary material
Source: PubMed Central journal article supplement (PMC6976210)
Supplement: 41997_2005_BF03405195_MOESM1_ESM.pdf [file 41997_2005_BF03405195_MOESM1_ESM.pdf]

# Les déterminants de la saine alimentation au Canada

## Aperçu et synthèse

Kim D. Raine, Ph.D., R.D.

### RÉSUMÉ

Le présent article traite des interactions complexes observées au niveau des divers déterminants de la saine alimentation, dans une optique de santé de la population. Nous examinerons l'état actuel des connaissances à l'égard des déterminants de la saine alimentation à partir des catégories suivantes : 1) les déterminants individuels des choix alimentaires personnels et 2) les déterminants collectifs, à savoir a) les déterminants environnementaux en tant que contexte entourant les comportements alimentaires et b) les politiques publiques en tant que créatrices d'environnements favorables à la saine alimentation. Une synthèse de la littérature scientifique a révélé que les déterminants individuels des choix alimentaires (état physiologique, préférences alimentaires, connaissances en nutrition, perceptions de la saine alimentation et facteurs psychologiques) pouvaient expliquer en partie le comportement alimentaire, mais qu'ils ne pouvaient l'expliquer totalement, étant donné que ce comportement est fortement influencé par le contexte. On entend par déterminants collectifs du comportement alimentaire, une vaste gamme de facteurs contextuels, à savoir l'environnement interpersonnel composé de la famille et des pairs, l'environnement physique qui détermine la disponibilité des aliments et leur accessibilité, l'environnement économique dans lequel les aliments sont avant tout des produits mis en marché dans une optique de profit et enfin l'environnement social qui inclut à la fois le statut social (revenu, niveau d'instruction et sexe) et le milieu culturel. Tous ces déterminants de la saine alimentation peuvent structurer les choix alimentaires de façon plus ou moins consciente. On sait que l'adoption de politiques peut influencer fortement de multiples environnements, mais on comprend encore mal le processus d'intervention nécessaire à l'échelle macroscopique et le véritable impact des différentes interventions sur la promotion de la saine alimentation. De nouvelles études s'imposent sur les déterminants collectifs des choix alimentaires et le contexte politique entourant la promotion de la saine alimentation. En s'efforçant de mieux comprendre les multiples contextes entourant la saine alimentation, dans une optique de promotion de la santé de la population, on pourra dégager des priorités de recherche et concevoir des stratégies d'intervention en matière de promotion de la saine alimentation.

**Mots clés :** nutrition; promotion de la santé; santé publique; environnement social; politiques visant des populations

La promotion de la saine alimentation a un impact significatif sur l'amélioration de la santé des populations, aussi bien à l'échelle locale que globale. Ainsi, l'épidémie actuelle d'obésité observée au Canada et partout dans le monde est associée à la modification des habitudes alimentaires (et du niveau d'activité). Ce fléau a des répercussions significatives sur la santé publique.<sup>1</sup> Il est essentiel de bien comprendre les multiples facteurs qui influencent le comportement alimentaire, ainsi que leurs interactions, si on veut être en mesure de promouvoir et de favoriser la saine alimentation au Canada.

Le présent article renferme (1) un aperçu des déterminants de la saine alimentation résultant de la synthèse des connaissances disponibles à l'heure actuelle présentée dans les six articles inclus dans le présent supplément et (2) des pistes de recherche entourant la promotion de la saine alimentation qui s'appuient sur les lacunes observées au niveau des connaissances. Cette synthèse et ces pistes de recherche s'inscrivent dans l'optique du Modèle de promotion de la santé de la population (MPSP). « Le MPSP s'inspire d'une approche de **santé de la population** en soulignant la nécessité de tenir compte de toute la gamme des déterminants de la santé lorsqu'on veut améliorer la santé. Il s'inspire aussi de la **promotion de la santé** en soulignant la nécessité d'intervenir globalement au niveau des facteurs sous-jacents et des circonstances qui déterminent la santé »<sup>2</sup>.

Dans une optique de santé de la population, on examine les interactions complexes des divers déterminants individuels (d'ordre biologique ou comportemental) et collectifs (d'ordre social, culturel, physique, économique et politique) de la santé. Par ailleurs, dans une optique de promotion de la santé de la population, on s'efforce non seulement de mieux comprendre les multiples contextes entourant la saine alimentation, mais aussi d'élaborer des stratégies de promotion de la saine alimentation incluant une vaste gamme d'interventions à l'échelle des populations. Ce mode de promotion de la santé va dans le sens des approches écologiques visant à promouvoir des modes de vie sains en s'appuyant sur des stratégies à paliers multiples en matière de santé publique<sup>3,4</sup>. Les approches écologiques peuvent inspirer

Centre for Health Promotion Studies, University of Alberta

**Correspondance et autorisation de reproduction :** Kim D. Raine, 5-10 University Extension Centre, 8303 112 Street, University of Alberta, Edmonton, AB T5G 2T4, Tél. : 780-492-9415, Téléc. : 780-492-9579, Courriel : kim.raine@ualberta.ca

l'élaboration de stratégies visant à encourager les individus à adopter des modes de vie sains, tout en influençant la mise en place de politiques visant à faciliter les changements sociaux et culturels. On peut catégoriser ces stratégies à partir du palier ciblé sur le plan écologique, à savoir le palier individuel ou intrapersonnel (connaissances, attitudes et comportements individuels), le palier interpersonnel (famille et pairs), le palier institutionnel (écoles, milieux de travail), le palier communautaire (inter agences et intersectoriel) et le palier des politiques publiques<sup>3</sup>. Les paliers écologiques ne sont pas isolés, mais plutôt étroitement reliés.

Dans le présent article, on tient compte de l'impact des déterminants de la saine alimentation sur les stratégies d'intervention en promotion de la santé. Ces déterminants sont catégorisés comme suit : 1) les déterminants individuels des choix alimentaires personnels et 2) les déterminants collectifs, à savoir a) les déterminants environnementaux en tant que contexte entourant les comportements alimentaires et b) les politiques publiques en tant que créatrices d'environnements favorables à la saine alimentation. Une telle classification ne vise pas à isoler les déterminants de la saine alimentation qui sont intimement reliés, mais plutôt à aider le lecteur à mieux comprendre l'état actuel des connaissances au niveau des déterminants de la saine alimentation. Elle vise aussi à faire ressortir les interventions prioritaires en matière de promotion de la saine alimentation et à identifier les lacunes pouvant faire l'objet d'études subséquentes.

### **Les choix alimentaires personnels en tant que déterminants individuels du comportement alimentaire**

À première vue, il semble que les comportements alimentaires d'une personne, qu'ils soient sains ou non, relèvent uniquement d'un choix personnel. Après tout, chez la majorité des personnes non institutionnalisées, le fait de se mettre des aliments dans la bouche est un acte purement individuel. Pourtant, les choix alimentaires personnels sont façonnés par divers déterminants individuels ou collectifs du comportement. Dans la présente section, on insiste sur les déterminants individuels, à savoir l'état physiologique, les préférences alimentaires, les connaissances en nutri-

tion, les perceptions de la saine alimentation et les facteurs psychologiques.

#### *Les influences physiologiques*

Le comportement alimentaire est influencé par le développement physiologique au début de la vie<sup>5</sup>, tout comme il est influencé par la dégénérescence entraînée par le vieillissement vers la fin de la vie<sup>6</sup>. Tout au long de l'enfance, la qualité de l'alimentation semble se détériorer avec l'âge, peut-être en raison du développement émotionnel et social qui procure aux enfants un plus grand contrôle sur leurs choix alimentaires. D'autres déterminants individuels entrent alors en jeu, tels que les préférences alimentaires et les connaissances en nutrition<sup>5</sup>. Tout au long du processus de vieillissement, l'état de santé et le niveau d'habiletés fonctionnelles influencent les comportements reliés à l'alimentation<sup>7-9</sup>. On peut mettre certaines ressources communautaires à la disposition des personnes âgées en vue de les aider à se procurer et à préparer des aliments sains. On leur permet ainsi d'avoir une saine alimentation malgré les changements physiologiques qui peuvent affecter leur état de santé<sup>10-12</sup>.

#### *Les préférences alimentaires*

Bien que les préférences alimentaires soient avant tout d'ordre individuel et qu'elles puissent même être d'origine physiologique (p. ex., la préférence innée pour le goût sucré et l'aversion pour les goûts plus amers), des normes sociales et culturelles déterminent également les diverses préférences alimentaires. Ainsi, on rapporte une préférence pour les aliments traditionnels chez les peuples autochtones<sup>14-20</sup>. Les préférences alimentaires des enfants sont probablement guidées uniquement par le goût<sup>13</sup>, tandis que chez les adultes des facteurs externes (tels que des indices environnementaux) contribuent davantage à ces préférences. La préférence marquée pour les aliments sucrés, observée couramment chez les enfants, s'estompe avec l'âge, tandis que celle pour les aliments à forte teneur en lipides perdure<sup>13</sup>. L'« anorexie physiologique du vieillissement »<sup>21,22</sup> est associée à une détérioration du goût et de l'odorat ainsi qu'aux changements métaboliques entraînés par le vieillissement.

#### *Les connaissances en nutrition*

Il a été démontré que les enfants et les adolescents comprenaient globalement la rela-

tion entre la façon de s'alimenter et la santé<sup>23,24</sup>. Toutefois, l'examen des études entourant le sujet, effectué par Taylor, a révélé des contradictions quant à la véritable influence des connaissances sur les choix alimentaires chez ces groupes d'âge<sup>5</sup>. Chez les personnes âgées, une forte sensibilisation à la nutrition et à la santé est associée à une meilleure alimentation et à de meilleurs apports en nutriments<sup>25-29</sup>, tandis que chez les populations adultes, les connaissances en nutrition et les perceptions de la saine alimentation sont étroitement reliées.

#### *Les perceptions de la saine alimentation*

Paquette<sup>30</sup> définit comme suit les perceptions de la saine alimentation : « L'interprétation, la compréhension, les points de vue, les attitudes et les croyances du grand public (...) à l'égard de la saine alimentation, des aliments à consommer pour rester en santé et des aliments sains. » (p. S16) Des modèles théoriques permettent de supposer que les principaux déterminants des choix alimentaires sont les idéaux et les présomptions relatives aux aliments<sup>31,32</sup>, ces dernières incluant les perceptions de la saine alimentation.

Parmi les perceptions du grand public à l'égard de la saine alimentation, mentionnons la consommation de légumes, de fruits et de viande, la diminution du sucre, des lipides et du sel, ainsi que les concepts de variété et de modération<sup>30</sup>. Toutes ces perceptions semblent être influencées par les recommandations nutritionnelles en vigueur qui ont pour but d'améliorer à la fois les connaissances en nutrition et les habitudes alimentaires. Toutefois, d'autres éléments importants de ces recommandations, entre autres la consommation de produits céréaliers et de produits laitiers, ne font habituellement pas partie des perceptions des gens à l'égard de la saine alimentation. Des éléments autres que nutritionnels semblent également être au centre des perceptions des gens à l'égard de la saine alimentation dont l'importance de consommer des aliments frais, non transformés ou entièrement préparés à la maison, ainsi que le concept d'équilibre<sup>30</sup>.

Les perceptions de la saine alimentation sont imprégnées des interprétations culturelles entourant les aliments et la santé. Ainsi, comme le souligne Willows<sup>33</sup> : « Les

choix alimentaires inspirés des valeurs culturelles autochtones ne correspondent pas toujours à la perception « occidentale » de la valeur nutritive des aliments. » (p. S38) En plus d'être nécessaires à la survie, les aliments traditionnels favorisent la santé en raison de leur valeur intrinsèque. Le concept à l'effet qu'un aliment quelconque puisse nuire à la santé, même un « aliment acheté au magasin », est fort difficile à saisir chez les Autochtones puisqu'il va à l'encontre de la culture<sup>33</sup>.

### *Les facteurs psychologiques*

L'examen de Polivy et Herman<sup>34</sup> révèle ce qui suit : « Parmi les facteurs psychologiques d'ordre individuel qui influencent l'alimentation, mentionnons certains traits de personnalité, tels que l'estime de soi, l'image corporelle, une tendance aux privations alimentaires (ou régimes répétitifs), de même que l'humeur et le centre d'attention. » (p. S50) Les auteurs soulignent fort à propos la relation bidirectionnelle observée entre l'acte de manger et divers états psychologiques. Ainsi, les facteurs psychologiques influencent les choix alimentaires, tandis que les choix alimentaires influencent le bien-être psychologique<sup>34</sup>.

Malgré le nombre significatif d'études menées au cours de la dernière décennie relativement à l'influence des facteurs psychosociaux sur la saine alimentation, à la fois chez les enfants et les adultes, la capacité de prédiction de divers modèles incluant des variables psychosociales demeure faible quant à la consommation alimentaire individuelle (p. ex., théorie de l'action raisonnée, théorie socio cognitive, modèle transthéorique)<sup>35</sup>. Ces modèles sont constamment raffinés et améliorés en vue de mieux saisir comment certaines facettes des facteurs environnementaux influencent divers comportements, dont la saine alimentation.

### *Sommaire des déterminants individuels de la saine alimentation*

Les choix alimentaires personnels sont façonnés par divers déterminants individuels du comportement alimentaire dont l'état physiologique, les préférences alimentaires, les connaissances en nutrition, les perceptions de la saine alimentation et divers facteurs psychologiques. Bien que les déterminants individuels puissent expliquer en partie le comportement alimen-

taire, ils ne peuvent l'expliquer complètement. La saine alimentation repose sur des choix complexes qui dépassent largement le niveau individuel, le comportement alimentaire étant fortement contextuel.

### **Les déterminants collectifs, 1<sup>ère</sup> partie : les déterminants environnementaux de la saine alimentation en tant que contexte entourant le comportement individuel**

Dans le présent article, le terme « environnement » regroupe une vaste gamme de facteurs contextuels qui influencent le comportement alimentaire. L'environnement peut être plus ou moins familier ou circonscrit, comme par exemple l'environnement interpersonnel qui est composé de la famille et des pairs. L'environnement peut également exercer son action en l'absence de sensibilisation et de contrôle immédiats. Ainsi, l'accessibilité aux aliments et leur disponibilité dépendent de l'environnement physique. Dans l'environnement économique, on considère les aliments comme des produits servant à générer des profits, tandis que dans l'environnement social, certains déterminants de la saine alimentation, dont le statut social et le milieu culturel, influencent parfois subrepticement certains choix alimentaires. On explique dans la présente section l'état actuel des connaissances entourant les déterminants environnementaux de la saine alimentation ainsi que les interactions des divers environnements.

### *Les influences interpersonnelles sur la saine alimentation*

La famille revêt une grande importance au niveau des choix alimentaires des enfants, étant donné qu'il s'agit du premier environnement social immédiat dans lequel les enfants acquièrent et mettent pratique leurs habitudes alimentaires<sup>36,37</sup>. La famille peut aussi bien avoir des effets positifs que négatifs sur les habitudes alimentaires de tous membres de la famille, peu importe l'âge. Ainsi, l'examen de Polivy et Herman<sup>34</sup>, révèle que « la famille contribue à l'apparition de comportements alimentaires déviants ou de troubles alimentaires, à la consommation de plus grandes quantités d'aliments chez les enfants souffrant d'un excès de poids, ainsi qu'à la consommation de certaines quantités de fruits et de légumes ». (p. S51) La façon dont la famille

s'approvisionne en nourriture et la répartition des aliments entre les membres de la famille sont des pratiques qui varient en fonction du sexe du parent responsable. Ainsi, les mères se sacrifient souvent lorsque les ressources alimentaires se font rares dans le but d'assurer un apport alimentaire approprié à leurs enfants et de les protéger contre la faim<sup>38</sup>. À mesure que les enfants avancent en âge, l'influence familiale diminue en faveur des nouvelles relations sociales qui se nouent à l'extérieur du foyer<sup>39</sup>. L'influence des pairs et de diverses autres personnes peut se prolonger tout au long de la vie en agissant au niveau de la perception des normes alimentaires, tout particulièrement lorsqu'on mange en compagnie d'autres personnes<sup>34</sup>. Chez les personnes âgées, l'isolement social semble avoir un impact négatif sur l'apport alimentaire, surtout chez les hommes<sup>6</sup>. On constate que les familles sont profondément ancrées dans un environnement social plus vaste, comme le démontrent les différences observées entre les sexes au niveau des méthodes d'approvisionnement alimentaire et de la façon de s'alimenter lorsqu'on est isolé socialement, de même que l'influence des diverses relations extra familiales sur le comportement alimentaire. L'environnement social sera traité plus en détail dans une section subséquente.

### *L'environnement physique en tant que déterminant de la saine alimentation*

On entend par environnement physique tous les facteurs qui influencent l'accessibilité aux aliments et leur disponibilité. Il est évident qu'on ne peut pas s'alimenter sainement lorsque les aliments sains ne sont ni disponibles, ni accessibles. Bien que l'approvisionnement alimentaire soit abondant au Canada, comme le démontrent les données relatives à la consommation apparente des aliments<sup>40</sup>, on ignore la contribution nutritive exacte des aliments disponibles. Ainsi, est-ce que les aliments disponibles au Canada, considérant les quantités offertes, constituent un « panier d'aliments national » permettant de respecter les recommandations en vigueur en matière d'alimentation et de nutrition? Par ailleurs, on observe de grandes différences au niveau de la production, du transport, de la distribution (c.-à-d. marché régulier ou organismes de bienfaisance) et de la façon de se procurer des

aliments (à partir de la terre ou au magasin) dans un pays aussi diversifié que le Canada sur le plan géographique et culturel. On peut aussi acheter des aliments dans divers services alimentaires selon les collectivités ou encore en milieu de travail ou à l'école.

Le rôle de l'environnement physique est encore plus prononcé dans les collectivités nordiques ou éloignées où habitent en grande majorité les peuples autochtones. Comme le souligne Willows<sup>33</sup>, les changements observés au niveau de l'environnement physique sont associés au développement technologique (c.-à-d. barrages hydro-électriques, déforestation). La contamination environnementale qui en résulte nuit à la disponibilité des aliments traditionnels. Le remplacement de ces derniers par des aliments commerciaux ne favorise pas nécessairement la saine alimentation. En effet, en raison des frais de transport élevés et des problèmes de conservation reliés à certains aliments, les magasins offrent plus souvent des aliments non périssables moins nutritifs (p. ex., boissons gazeuses, croustilles). L'interrelation des environnements physique et économique apparaît alors clairement puisque ce sont les stratégies de gestion des stocks mises de l'avant par les gérants des magasins qui déterminent la disponibilité des aliments<sup>33</sup>.

Le rôle de l'environnement physique en tant que déterminant de la saine alimentation est un peu moins apparent chez les populations urbaines. On constate toutefois que cet environnement n'a pas vraiment été construit en vue de favoriser la saine alimentation. Ainsi, les supermarchés offrant des aliments sains à moindre coût sont pratiquement absents dans les collectivités à faible revenu<sup>38</sup> et dans les environs des résidences de personnes âgées<sup>6</sup>. La plupart des grands supermarchés étant installés près des autoroutes, il faut s'y rendre en automobile. Par ailleurs, les restaurants qui offrent des aliments de moins bonne valeur nutritive s'installent la plupart du temps en milieu urbain, plus particulièrement dans les quartiers à faible revenu<sup>41</sup>. Étant donné que le faible revenu semble être le dénominateur commun de l'accessibilité physique aux aliments, l'interrelation des environnements physique et économique semble évidente.

Même dans des environnements physiques « contrôlés ou captifs », tels que les écoles, le fait d'offrir des aliments à

faible valeur nutritive plutôt que des aliments plus sains influence probablement les choix alimentaires<sup>5</sup>. On peut créer un environnement favorable à la saine alimentation en adoptant des politiques de nutrition dans les écoles, incluant des clauses telles que l'approbation préalable des menus servis à l'école et des aliments vendus dans les divers magasins scolaires, l'élaboration de lignes directrices relatives aux boîtes à lunch et l'offre d'aliments plus sains lors des activités de collecte de fonds<sup>42</sup>. Il s'agit d'un bel exemple des interrelations complexes des déterminants de la saine alimentation puisque les politiques de nutrition à l'école pourraient même aller à l'encontre de la notion de profit. Ce point sera discuté plus en détail dans la section portant sur l'environnement économique.

On observe aussi des interactions des environnements social, économique et physique dans le contexte du système de distribution des aliments géré par des organismes de bienfaisance au Canada, surtout au niveau des banques alimentaires. Étant donné que les banques alimentaires sont désormais institutionnalisées au Canada<sup>43</sup>, elles représentent un canal de distribution où les Canadiens à faible revenu se procurent régulièrement leurs aliments, ou du moins une partie de ceux-ci. C'est pourquoi ces banques sont considérées partie intégrante de l'environnement physique. Une étude canadienne portant sur la valeur nutritive des aliments offerts dans les banques alimentaires permet de supposer que cette population n'a peut-être pas accès à une quantité suffisante d'aliments sains<sup>44</sup>.

#### *L'environnement économique en tant que déterminant de la saine alimentation*

Dans le système d'économie de marché en vigueur au Canada, l'environnement économique, dans lequel les aliments sont considérés comme des produits pouvant générer du profit, influence considérablement les habitudes alimentaires. Les messages publicitaires ciblent de plus en plus les jeunes enfants. Ceux-ci sont particulièrement vulnérables, compte tenu de leur manque d'esprit critique en tant que consommateurs. Les spécialistes du marketing s'appuient en outre sur la forte influence des enfants et des jeunes au niveau des comportements d'achat des per-

sonnes qui en sont responsables et aussi sur les sommes d'argent considérables dont disposent les enfants et les jeunes d'aujourd'hui<sup>45</sup>. Comme le souligne Taylor<sup>5</sup>, à partir d'un très jeune âge, les enfants sont bombardés de messages publicitaires télévisés, la grande majorité de ces messages faisant la promotion d'aliments à teneur élevée en lipides et en sucre sans encourager la consommation des fruits et légumes. L'exposition à de tels messages médiatiques influence certains déterminants individuels de la saine alimentation, tels que les préférences alimentaires et les perceptions de la saine alimentation. En effet, ces messages transmettent souvent des informations douteuses dans l'unique but de vendre des aliments spécifiques, sans faire la promotion de l'alimentation globale<sup>5</sup>. Par ailleurs, les adultes sont loin d'être insensibles aux messages des médias<sup>34</sup>.

En plus de concevoir de tels messages, les spécialistes du marketing font également la promotion d'aliments moins bons pour la santé dans des environnements physiques spécifiques (écoles, milieux de travail). La prolifération des machines distributrices offrant des boissons gazeuses dans les écoles n'est qu'un exemple parmi d'autres des interactions des environnements physique et économique. Bien que la vente de boissons gazeuses ne soit pas une pratique courante dans les écoles primaires du Canada, elle l'est dans la plupart, sinon la totalité des écoles secondaires. De nombreux campus universitaires ont même signé des contrats d'exclusivité qui visent avant tout à engendrer une fidélité à la marque<sup>46</sup> avec des fabricants de boissons gazeuses. Comme le souligne fort à propos Power dans son examen<sup>38</sup>, l'industrie alimentaire est avant tout axée sur le profit, ce qui va souvent à l'encontre de la promotion de la saine alimentation<sup>47,48</sup>. En raison des stratégies de marketing qu'elle utilise, l'industrie alimentaire joue un rôle significatif au niveau du façonnement des normes sociales entourant l'alimentation. L'environnement économique et l'environnement social interagissent alors en tant que déterminants de la saine alimentation.

De nombreuses expériences de formation en nutrition ont été tentées dans des établissements de vente au détail ou des services alimentaires, en partenariat avec

l'industrie alimentaire. L'objectif visant à motiver les gens à consommer des aliments sains a été plus ou moins atteint<sup>49</sup>. On a aussi utilisé des stratégies fondées sur le prix en vue de faire la promotion d'aliments sains. Une évaluation de l'efficacité des messages en nutrition par rapport à celle d'une réduction de prix a révélé qu'une réduction de prix pourrait s'avérer encore plus efficace que la diffusion de messages reliés à la santé en vue de favoriser la consommation d'aliments sains<sup>50</sup>. Une telle constatation s'avère particulièrement importante quant à l'octroi de subsides. En y réfléchissant bien, toutefois, il faut reconnaître que l'industrie alimentaire n'acceptera de telles stratégies que dans la mesure où elles lui seront profitables. Les politiques publiques, qui feront l'objet d'une section subséquente, sont un autre moyen pouvant inciter les corporations à vocation économique à créer un environnement social qui favorise davantage le choix d'aliments sains.

Il a été clairement démontré qu'au Canada « le principal obstacle à la saine alimentation [est] un revenu insuffisant »<sup>38</sup> (p. S44). En tant que déterminant de la saine alimentation, l'insuffisance de revenu touche plusieurs groupes sociaux, notamment les enfants<sup>5</sup>, les personnes âgées et les peuples autochtones. Dans un système d'économie de marché, les personnes ayant un revenu insuffisant pour se procurer une saine alimentation, peu importe les raisons, qu'il s'agisse de prestations insuffisantes du bien-être social, d'un salaire minimum insuffisant ou du coût élevé des aliments sains ou d'une saine alimentation, ne peuvent pas jouer leur véritable rôle en tant que consommateurs. Il est vrai qu'en améliorant certains déterminants individuels, tels que les connaissances en nutrition, on pourrait aider ces personnes à mieux se débrouiller, mais, comme l'a démontré clairement l'examen de Power<sup>38</sup>, la plupart des Canadiens et des Canadiennes à faible revenu font déjà preuve d'une grande débrouillardise : « Il a été démontré que les ménages à faible revenu obtiennent plus de nutriments pour chaque dollar consacré à l'alimentation que les ménages à revenu plus élevé ». (p. S44)

Divers projets communautaires ont été mis de l'avant, tels que des conseils de politiques alimentaires, en tant que modèles de promotion de la saine alimentation fondés

sur une amélioration des déterminants physiques et économiques de la saine alimentation. Ces projets facilitent, par exemple, l'accès à une variété d'aliments nutritifs, à prix abordable. Ainsi, le *Toronto Food Policy Council (TFPC)* du *Toronto Board of Health* a été mis en place en 1990, en vue de répondre aux besoins de la population urbaine à faible revenu. Le *TFPC* est une organisation unique en son genre qui compte parmi ses membres des représentants de grandes corporations alimentaires, de fermes conventionnelles ou organiques, de coopératives, de syndicats, de groupes de défense de la justice sociale et de groupes religieux, de même que du Conseil de ville. De nombreuses parties intéressées s'engagent ainsi vers l'atteinte d'un but commun, au niveau communautaire et bien au-delà. Le Conseil de ville appuie certains programmes, entre autres le programme *Field to Table* (de la ferme à la table), qui permet à des résidents urbains à faible revenu d'entrer en contact avec des fermiers qui cherchent un marché pour leurs produits et aussi de cultiver des jardins sur les toits ou dans des espaces communautaires. Sur le plan local, le *TFPC* vise à « appuyer les efforts à plus long terme visant à élaborer des politiques à l'échelle municipale et provinciale en vue d'aider les fermiers de l'Ontario, tout en fournissant aux habitants de Toronto des aliments nutritifs et de qualité, produits dans le respect de l'environnement »<sup>51</sup>. De nouvelles études s'imposent en vue de vérifier si les approches communautaires axées sur les déterminants économiques de la saine alimentation pourraient être couronnées de succès dans divers autres contextes canadiens. Ainsi, il faudra vérifier si ces approches ont un impact sur les quantités d'aliments offertes et sur les habitudes alimentaires, si elles influencent les politiques visant à promouvoir des environnements qui favorisent la saine alimentation à l'échelle de la population et finalement, si elle peuvent améliorer la santé de la population à la longue.

#### *L'environnement social en tant que déterminant de la saine alimentation*

Il a été clairement démontré dans les sections précédentes que la nourriture et l'acte de manger revêtent des significations qui vont bien au-delà du simple fait de se nourrir sur les plans physique et émotion-

nel. L'acte de manger est un acte social qui dépend fortement, non seulement des interprétations individuelles relatives à la saine alimentation, telles qu'influencées par les recommandations nutritionnelles et les stratégies de marketing, mais aussi des environnements physique et économique qui déterminent quels aliments sont disponibles et à quel prix. La nourriture et l'acte de manger jouent aussi un rôle sur les plans social, culturel et symbolique puisqu'ils peuvent resserrer les liens communautaires en intensifiant le sens d'appartenance et l'entraide mutuelle<sup>52,53</sup>. Il est généralement impossible de porter un regard critique sur son propre environnement social et sa propre culture. En effet, les gens sont tellement imprégnés des normes socioculturelles qu'ils prennent pour acquis la façon dont se déroule leur vie quotidienne. L'environnement social déconnecte de plus en plus les gens de la source même des aliments. On achète désormais les aliments dans des supermarchés ou des restaurants plutôt que de se les procurer directement à partir de la ferme, de la terre ou de la mer. Le contexte social actuel ne valorise pas non plus la préparation des aliments à la maison; il favorise plutôt la consommation d'aliments congelés ou vite faits. Il est désormais beaucoup moins important de partager des repas avec d'autres personnes. L'économie de temps étant devenue primordiale, on a recours à des services de « commandes au volant » et on consomme de plus en plus d'aliments prêts à emporter ou prêts à manger<sup>45</sup>. Les aliments continuent pourtant à faire partie de diverses célébrations (étapes de la vie ou traditions), étant donné que la nourriture et l'acte de manger ont une forte connotation sociale.

Il est plus facile de comprendre sa propre culture en examinant d'autres cultures. Ainsi, comme le souligne Willows<sup>33</sup> : « Pour mieux comprendre comment la culture influence les choix alimentaires chez les communautés autochtones, il importe de constater que les activités mises en branle pour se procurer des aliments traditionnels vont bien au-delà du simple fait de se procurer de la nourriture. En effet, il s'agit plutôt d'un mode de production qui renforce les relations sociales et l'enracinement culturel ». (p. S37) On retrouve aussi cette forte dimension sociale de la nourriture et de l'acte de manger au sein de la culture

dominante au Canada, tel que mentionné précédemment. Le rôle important de la nourriture au niveau du maintien des relations sociales et du respect des spécificités culturelles n'a donc rien de nouveau ni d'étonnant.

La question à se poser désormais est la suivante : Est-ce qu'on choisit sa destinée culturelle ou est-ce qu'on accepte tout simplement les « choix » dictés par des intérêts contraires à la promotion de la santé ? Dans le cas où, comme le souligne Power<sup>38</sup> : « En supposant que l'une des conditions indispensables à l'amélioration des habitudes alimentaires chez les Canadiens (...) réside dans une amélioration de la culture alimentaire dominante et des normes alimentaires, (...) il s'avère important de mieux définir les cultures et normes alimentaires observées au pays en vue de pouvoir trouver des moyens efficaces de les faire évoluer dans le bon sens ». (p. S45) Le fait d'examiner les pratiques alimentaires dans un contexte politique plus large permet d'évaluer la possibilité de mettre en place un contexte culturel et un environnement social plus favorables à la promotion de la saine alimentation.

### **Les déterminants collectifs, 2<sup>e</sup> partie : la mise en place d'environnements favorisant la saine alimentation par le recours à des politiques de santé publique**

Les politiques guident nos choix en définissant ce qui est considéré important. Les individus respectent parfois des règles implicites en matière d'alimentation. Ainsi, ils peuvent faire leurs choix à la lumière des préférences familiales, de la valeur nutritive, du coût, de la protection de l'environnement, de motifs religieux ou de nombreuses autres motivations. Les politiques adoptées à l'échelle locale, régionale ou nationale peuvent avoir un impact significatif sur les choix alimentaires collectifs et donc agir en tant que déterminants de la saine alimentation. La capacité d'effectuer des changements macroscopiques dans l'environnement social, dans une optique de saine alimentation, dépend, en partie, de la volonté politique.

Parmi les approches politiques les moins controversées et les plus reconnues en matière de promotion de la saine alimentation, mentionnons les recommandations nutritionnelles qui visent avant tout à

améliorer les connaissances en nutrition et les perceptions de la saine alimentation. Santé Canada favorise la santé nutritionnelle et le bien-être de la population canadienne en collaborant à la définition, la promotion et la mise en oeuvre de politiques et de normes nutritionnelles fondées sur des preuves scientifiques. Il a publié à cet effet des documents tels que le *Guide alimentaire canadien pour manger sainement*<sup>54</sup> et les *Recommandations alimentaires pour la santé des Canadiens et des Canadiennes*<sup>55</sup>. Ces documents appuient les politiques, les normes et les programmes entourant la nutrition et la santé, partout au pays. Ils servent de fondements à de nombreux projets faisant la promotion d'un mode de vie sain. Le plan national d'action sur la nutrition, intitulé *La nutrition pour un virage santé : voies d'action (1996)*<sup>56</sup> s'appuie sur un modèle de santé de la population. Il définit les orientations stratégiques visant à encourager l'élaboration de politiques et de programmes à partir d'un processus coordonné et intersectoriel qui renforce les partenariats existants ou en crée de nouveaux, en insistant sur une utilisation efficace du peu de ressources disponibles. Il encourage toute recherche pertinente visant à améliorer la santé nutritionnelle des Canadiens et des Canadiennes.

Des politiques visant à protéger l'environnement naturel en vue de conserver l'approvisionnement alimentaire, telles que des mesures visant à prévenir la contamination industrielle des aliments et de l'eau, pourraient favoriser la saine alimentation à l'échelle macroscopique. Par ailleurs, les politiques agricoles et économiques influencent conjointement l'offre de denrées alimentaires sécuritaires, nutritives et à prix abordable.

Compte tenu des données probantes reliant le faible statut socio-économique et les inégalités sociales à une moins bonne alimentation et à un statut nutritionnel inférieur, les politiques de redistribution du revenu et celles qui fournissent un filet de sécurité sociale (impôt sur le revenu, impôts provinciaux sur les soins de santé) vont dans le sens de la promotion de la santé. Le maintien et la redéfinition du filet de sécurité sociale en vigueur au Canada pourraient permettre de promouvoir la saine alimentation. Certaines politiques spécifiques pourraient aussi influencer la saine alimentation, telles

qu'un rajustement des mesures de soutien du revenu afin de garantir les ressources financières indispensables à l'achat des composantes d'une saine alimentation, tel que recommandé dans *La nutrition pour un virage santé : voies d'action (1996)*<sup>56</sup>.

Dans une culture consumériste, les politiques protègent les consommateurs en faisant contrepois aux stratégies de marketing axées sur le profit plutôt que sur la santé. Ainsi, on pourrait subventionner la vente d'aliments ayant une faible valeur énergétique et une forte teneur en nutriments à l'aide d'une politique fiscale consistant à taxer suffisamment les aliments ayant une valeur énergétique élevée et une faible teneur en nutriments pour nuire à leur vente<sup>57</sup>. De telles politiques pourraient promouvoir la saine alimentation en encourageant l'achat d'aliments qui sont meilleurs pour la santé grâce à une modification des prix<sup>58</sup>. Cette politique de taxation a déjà été utilisée avec succès dans certaines juridictions; soit en vue de décourager l'achat de grignotines<sup>59</sup> ou encore de générer des revenus qui sont ensuite consacrés à la promotion de la santé<sup>60</sup>. Le système de TPS/HST en vigueur au Canada a déjà été suggéré comme modèle potentiel de modification de la structure de prix des aliments<sup>41</sup>. De nombreuses études s'imposent relativement à l'acceptabilité de telles politiques auprès du public et sur le niveau de taxation ou de financement à atteindre en vue de motiver véritablement les gens à modifier leurs comportements de consommation.

Dans le même ordre d'idées, compte tenu du temps d'exposition à des messages publicitaires portant sur des aliments, dont la majorité font la promotion d'aliments de faible valeur nutritive, on pourrait adopter des politiques visant à imposer des restrictions au niveau de la publicité. Compte tenu de l'opposition probable des corporations et des défenseurs des libertés civiles, il est important de reconnaître que l'appui du public s'avère essentiel à l'adoption et au succès de telles politiques<sup>59</sup>. Des études s'imposent en vue d'évaluer l'impact sur la saine alimentation des restrictions actuelles imposées en matière de publicité, comme l'interdiction de la publicité destinée aux enfants au Québec<sup>61</sup>. Il faudra également examiner le rôle de la compétence médiatique au niveau de l'augmentation de la résistance aux messages publicitaires. Aussi

bien dans le cas de la taxation que dans celui de la publicité, on recommande de s'inspirer des réussites observées en matière de lutte au tabagisme en tenant compte, bien sûr, des différences entre le tabac et les produits alimentaires. La conception d'interventions environnementales efficaces à l'échelle macroscopique, dans une optique de promotion de la saine alimentation, requiert des investissements significatifs au niveau de la recherche.

L'adoption de politiques peut influencer fortement de multiples environnements. Ainsi, les recommandations nutritionnelles ont été formulées en fonction d'un environnement où on retrouve de multiples messages, souvent contradictoires, en matière d'alimentation et de nutrition. Elles ont pour but de créer un environnement favorisant des choix individuels judicieux. Des politiques de protection de l'environnement pourraient permettre de contrôler la pollution industrielle, ce qui protégerait en même temps l'approvisionnement alimentaire. Des politiques économiques pourraient augmenter la capacité de se procurer des aliments. Des politiques sociales pourraient aider les Canadiens et Canadiennes défavorisés à devenir plus autonomes en faisant contre-poids aux intérêts économiques des corporations guidées uniquement par le profit et aussi contribuer à l'instauration d'une culture de consumérisme alimentaire, ce qui créerait un contexte culturel et un environnement social favorables à la saine alimentation.

## SOMMAIRE ET CONCLUSIONS

Dans le présent article, on traitait des interactions complexes observées au niveau des divers déterminants de la saine alimentation, dans une optique de santé de la population. Bien que les déterminants de la saine alimentation soient intimement reliés, notre synthèse des connaissances actuelles en matière de déterminants de la saine alimentation était organisée de la façon suivante, dans le but d'en favoriser la compréhension : 1) les déterminants individuels des choix alimentaires personnels, 2) les déterminants collectifs, à savoir a) les déterminants environnementaux en tant que contexte entourant les comportements alimentaires et b) les politiques publiques en tant que créatrices d'environnements

favorables à la saine alimentation. Les déterminants individuels des choix alimentaires (état physiologique, préférences alimentaires, connaissances en nutrition, perceptions de la saine alimentation et facteurs psychologiques) ne suffisent pas à expliquer le comportement alimentaire personnel étant donné que ce comportement est fortement influencé par le contexte. On entend par déterminants collectifs du comportement alimentaire, une vaste gamme de facteurs contextuels, à savoir l'environnement interpersonnel composé de la famille et des pairs, l'environnement physique qui détermine l'accessibilité aux aliments et leur disponibilité, l'environnement économique dans lequel les aliments sont avant tout des produits mis en marché dans une optique de profit et enfin l'environnement social qui inclut le statut social (revenu, niveau d'instruction et sexe) et le milieu culturel. Tous ces déterminants de la saine alimentation peuvent structurer les choix alimentaires de façon plus ou moins consciente. Par ailleurs, l'adoption de politiques pourrait influencer fortement de multiples environnements.

Cette synthèse globale des déterminants de la saine alimentation a permis de faire ressortir une pénurie de données attribuable, entre autres, à l'absence quasi-totale de système de surveillance des aliments, de la nutrition et de la santé. L'adoption d'un système de surveillance canadien exhaustif et intégré permettrait de recueillir les informations de base nécessaires à la compréhension des déterminants de la saine alimentation à tous les niveaux. Une surveillance continue permettrait en outre d'évaluer l'impact des diverses interventions.

En essayant de mieux comprendre les déterminants de la saine alimentation dans une optique de promotion de la santé de la population, on pourra dégager des priorités de recherche et définir les interventions prioritaires en matière de promotion de la saine alimentation. On observe actuellement de nombreuses lacunes au niveau des connaissances relatives aux déterminants individuels de la saine alimentation et des lacunes encore plus significatives au niveau des déterminants collectifs. Il est essentiel de comprendre les interactions complexes des multiples environnements et le contexte politique entourant les choix alimentaires individuels en vue de mieux orienter

les efforts visant à promouvoir et à favoriser la saine alimentation au Canada. On observe actuellement des lacunes importantes au niveau de la définition du processus d'intervention nécessaire et des politiques qui s'imposent à l'échelle macroscopique. On connaît mal l'impact de telles interventions sur la promotion de la saine alimentation. C'est pourquoi il faudra investir significativement dans la recherche entourant les déterminants environnementaux des choix alimentaires et le contexte politique à mettre en place, dans une optique de promotion d'une saine alimentation.

## RÉFÉRENCES

1. Organisation mondiale de la santé. WHO Technical Report Series No 894. Obesity: Preventing and managing the global epidemic. Genève, Suisse: Auteur, 2000.
2. Hamilton N, Bhatti T. Promotion de la santé de la population : Modèle d'intégration de la santé de la population et de la promotion de la santé. [mise à jour du 29 nov. 2002; cité le 9 sept. 2004. Disponible à l'adresse suivante : <http://www.phac-aspc.gc.ca/ph-sp/phdd/php/php.htm>.
3. McLeroy KR, Bibeau D, Steckler A, Glanz K. An ecological perspective on health promotion programs. *Health Educ Q* 1988;15(4):351-77.
4. Green LW, Richard L, Potvin L. Ecological foundations of health promotion. *Am J Health Promot* 1996;10(4):270-81.
5. Taylor J. Les déterminants de la saine alimentation chez les enfants et les jeunes du Canada. *Rev can santé publique* 2005;96(Suppl. 3):S22-S29.
6. Payette H, Shatenstein B. Les déterminants de la saine alimentation chez les personnes âgées vivant dans la collectivité. *Rev can santé publique* 2005;96(Suppl. 3):S30-S35.
7. Payette H, Gray-Donald K, Cyr R, Boutier V. Predictors of dietary intake in a functionally dependent elderly population in the community. *Am J Public Health* 1995;85(5):677-83.
8. Gray-Donald K. The frail elderly: Meeting the nutritional challenges. *J Am Diet Assoc* 1995;95(5):538-40.
9. Keller HH, Østbye T, Bright-See E. Predictors of dietary intake in Ontario seniors. *Rev can santé publique* 1997;88(5):305-9.
10. Finley B. Nutritional needs of the person with Alzheimer's disease: Practical approaches to quality care. *J Am Diet Assoc* 1997; 97(10 Suppl 2):S177-80.
11. Payette H, Ferland G. La malnutrition chez les personnes âgées démentes : étiologie, évolution et efficacité des interventions. Dans : *La collection l'année gériatrique*. Paris, France : Maison Serdi, 1999;131-45.
12. Shatenstein B, Ferland G. Absence of nutritional or clinical consequences of decentralised bulk food portioning in elderly nursing home residents with dementia in Montreal. *J Am Diet Assoc* 2000;100(11):1354-60.
13. Drewnowski A. Taste preferences and food intake. *Annu Rev Nutrition* 1997;17(1):237-53.
14. Brody H. *Living Arctic: Hunters of the Canadian North*. Vancouver/Toronto: Douglas & McIntyre, 1987.
15. Wein EE, Freeman MM. Inuvialuit food use and food preferences in Aklavik, Northwest

- Territories, Canada. *Arctic Med Res* 1992;51(4):159-72.
16. Kuhnlein HV. Factors influencing use of traditional foods among the Nuxalk people. *J Can Diet Assoc* 1989;50:102-8.
  17. Kuhnlein HV. Change in the use of traditional foods by the Nuxalk native people of British Columbia. *Ecol Food Nutrition* 1992;27(3-4):259-82.
  18. Trifonopoulos M. Anthropometry and diet of Mohawk schoolchildren in Kahnawake [Masters thesis]. Montreal, QC: McGill University, 1995.
  19. Bernard L, Lavallee C, Gray-Donald K, Delisle H. Overweight in Cree schoolchildren and adolescents associated with diet, low physical activity, and high television viewing. *J Am Diet Assoc* 1995;95(7):800-2.
  20. Bernard L, Lavallee C. Eating habits of Cree school children: A pilot study. Montreal, QC: Community Health Department, Montreal General Hospital, 1993.
  21. Morley JE, Thomas DR. Anorexia and aging: Pathophysiology. *Nutrition* 1999;15(6):499-503.
  22. Morley JE. Decreased food intake with aging. *J Gerontol A Biol Sci Med Sci* 2001;56(Spec No 2):81-88.
  23. Pirouznia M. The correlation between nutrition knowledge and eating behavior in an American school: The role of ethnicity. *Nutr Health* 2000;14(2):89-107.
  24. Birch LL. Children's preferences for high fat foods. *Nutr Rev* 1992;50(9):249-55.
  25. Murphy SP, Davis MA, Neuhaus JM, Lein D. Factors influencing the dietary adequacy and energy intake of older Americans. *J Nutr Educ* 1990;22(6):284-91.
  26. McIntosh WA, Kubena KS, Walker J, Smith D, Landmann WA. The relationship between beliefs about nutrition and dietary practices of the elderly. *J Am Diet Assoc* 1990;90(5):671-76.
  27. Toner HM, Morris JD. A social-psychological perspective of dietary quality in later adulthood. *J Nutr Elderly* 1992;11(4):35-53.
  28. Lahmann PH, Kumanyika SK. Attitudes about health and nutrition are more indicative of dietary quality in 50- to 75-year-old women than weight and appearance concerns. *J Am Diet Assoc* 1999;99(4):475-78.
  29. Shatenstein B, Nadon S, Ferland G. Determinants of diet quality among Quebecers aged 55-74. *J Nutr Health Aging* 2004;8(2):83-91.
  30. Paquette M-C. Perceptions of healthy eating: State of knowledge and research gaps. *Rev can santé publique* 2005;96(Suppl. 3):S16-S21.
  31. Falk LW, Bisogni CA, Sobal J. Food choice processes of older adults: A qualitative investigation. *J Nutr Educ* 1996;28(5):257-65.
  32. Furst T, Connors M, Bisogni CA, Sobal J, Falk LW. Food choice: A conceptual model of the process. *Appetite* 1996;26(3):247-65.
  33. Willows N. Les déterminants de la saine alimentation chez les peuples autochtones du Canada : état actuel des connaissances et lacunes au niveau de la recherche. *Rev can santé publique* 2005;96(Suppl. 3):S36-S41.
  34. Polivy J, Herman CP. La santé mentale et les comportements alimentaires : une relation bidirectionnelle. *Rev can santé publique* 2005;96(Suppl. 3):S49-S53.
  35. Baranowski T, Cullen KW, Baranowski J. Psychosocial correlates of dietary intake: Advancing dietary intervention. *Annu Rev Nutr* 1999;19:17-40.
  36. Davison KK, Birch LL. Childhood overweight: A contextual model and recommendations for future research. *Obes Rev* 2001;2(3):159-71.
  37. Baranowski T, Smith M, Hearn MD, Lin LS, Baranowski J, Doyle C, et al. Patterns in children's fruit and vegetable consumption by meal and day of the week. *J Am Coll Nutr* 1997;16(3):216-23.
  38. Power EM. Les déterminants de la saine alimentation chez les Canadiens à faible revenu. *Rev can santé publique* 2005;96(Suppl. 3):S42-S48.
  39. Rozin P, Vollmecke TA. Food likes and dislikes. *Annu Rev Nutr* 1986;6:433-56.
  40. Statistique Canada. Statistiques sur les aliments 2001. Ottawa, ON : Ministère de l'Industrie, 2003.
  41. Raine K. Le surpoids et l'obésité au Canada : une perspective de la santé de la population. Ottawa, ON: Institut canadien d'information sur la santé, 2004.
  42. Booth SL, Sallis JF, Ritenbaugh C, Hill JO, Birch LL, Frank LD, et al. Environmental and societal factors affect food choice and physical activity: Rationale, influences, and leverage points. *Nutr Rev* 2001;59(Suppl. 3):57-65.
  43. Tarasuk VS, Maclean H. The institutionalization of food banks in Canada: A public health concern. *Rev can santé publique* 1990;81(4):331-32.
  44. Jacobs Starkey L, Kuhnlein HV. Montreal food bank users' intakes compared with recommendations of Canada's Food Guide to Healthy Eating. *Can J Diet Pract Res* 2000;61(2):73-75.
  45. Schlosser E. *Fast Food Nation: The Dark Side of the All-American Meal*. New York, NY: Perennial, 2002.
  46. Nestle M. Soft drink "pouring rights": Marketing empty calories. *Public Health Rep* 2000;115(4):308-19.
  47. Drewnowski A, Specter SE. Poverty and obesity: The role of energy density and energy costs. *Am J Clin Nutr* 2004 Jan;79(1):6-16.
  48. Nestle M. *Food Politics: How the Food Industry Influences Nutrition and Health*. Berkeley, CA: University of California Press, 2002.
  49. Schmitz KH, Jeffery RW. Prevention of obesity. In: Wadden TA, Stunkard AJ (Eds.), *Handbook of Obesity Treatment*. New York, NY: The Guilford Press, 2002;556-93.
  50. Battle Horgen K, Brownell KD. Comparison of price change and health message interventions in promoting healthy food choices. *Health Psychol* 2002;21(5):505-12.
  51. Toronto Food Policy Council. Toronto Food Policy Council [Web Page]. Available at <http://www.ryerson.ca/~foodsec/food-policy/>. (Accessed 2002 Dec).
  52. Stone DA. *Policy Paradox and Political Reason*. Glenview, IL: Scott, Foresman, 1988.
  53. DeVault M. *Feeding the Family: The Social Organization of Caring as Gendered Work*. Chicago, IL: University of Chicago Press, 1991.
  54. Santé Canada. Guide alimentaire canadien pour manger sainement [mise à jour du 1<sup>er</sup> oct. 2002; cité le 3 mars 2003]. Disponible à l'adresse suivante : [http://www.hc-sc.gc.ca/hpfb-dgpsa/onpp-bppn/food\\_guide\\_rainbow\\_f.html](http://www.hc-sc.gc.ca/hpfb-dgpsa/onpp-bppn/food_guide_rainbow_f.html).
  55. Santé et Bien-être social Canada. Action concertée pour une saine alimentation : recommandations alimentaires pour la santé des Canadiens et Canadiennes et stratégies recommandées pour la mise en application. Ottawa, ON: Ministère des Approvisionnement et Services Canada, 1990.
  56. Bureau de la politique et de la promotion de la nutrition. La nutrition pour un virage santé : voies d'action. Ottawa, ON: Santé Canada, 1996. Disponible à l'adresse suivante : [http://www.hc-sc.gc.ca/hpfb-dgpsa/onpp-bppn/nutrition\\_health\\_agenda\\_f.html](http://www.hc-sc.gc.ca/hpfb-dgpsa/onpp-bppn/nutrition_health_agenda_f.html)
  57. Nestle M, Jacobson MF. Halting the obesity epidemic: A public health policy approach. *Public Health Rep* 2000;115(1):12-24.
  58. Jeffery RW. Public health strategies for obesity treatment and prevention. *Am J Health Behav* 2001;25(3):252-59.
  59. Battle Horgen K, Brownell KD. Policy change as a means for reducing the prevalence and impact of alcoholism, smoking and obesity. In: Miller WR, Heather N (Eds.), *Treating Addictive Behaviors*. New York, NY: Plenum Press, 1998;105-18.
  60. Jacobson MF, Brownell KD. Small taxes on soft drinks and snack foods to promote health. *Am J Public Health* 2000;90(6):854-57.
  61. Advertising Standards Canada. *Canadian Code of Advertising Standards*. Toronto, ON: ASC, 2004.
